# Supplementary material for: Multiplexed high-throughput immune cell imaging reveals molecular health-associated phenotypes
Source: PubMed Central journal article supplement (PMC9629716; doi:10.1126/sciadv.abn5631), 2022-11-02
Supplement: sciadv.abn5631_sm.pdf [file sciadv.abn5631_sm.pdf]

Supplementary Materials for  
**Multiplexed high-throughput immune cell imaging reveals molecular  
health-associated phenotypes**

Yannik Severin *et al.*

Corresponding author: Berend Snijder, [snijder@imsb.biol.ethz.ch](mailto:snijder@imsb.biol.ethz.ch)

*Sci. Adv.* **8**, eabn5631 (2022)  
DOI: 10.1126/sciadv.abn5631

**The PDF file includes:**

Figs. S1 to S6  
Legend for data file S1  
Tables S1 to S3

**Other Supplementary Material for this manuscript includes the following:**

Data file S1

Fig. S1

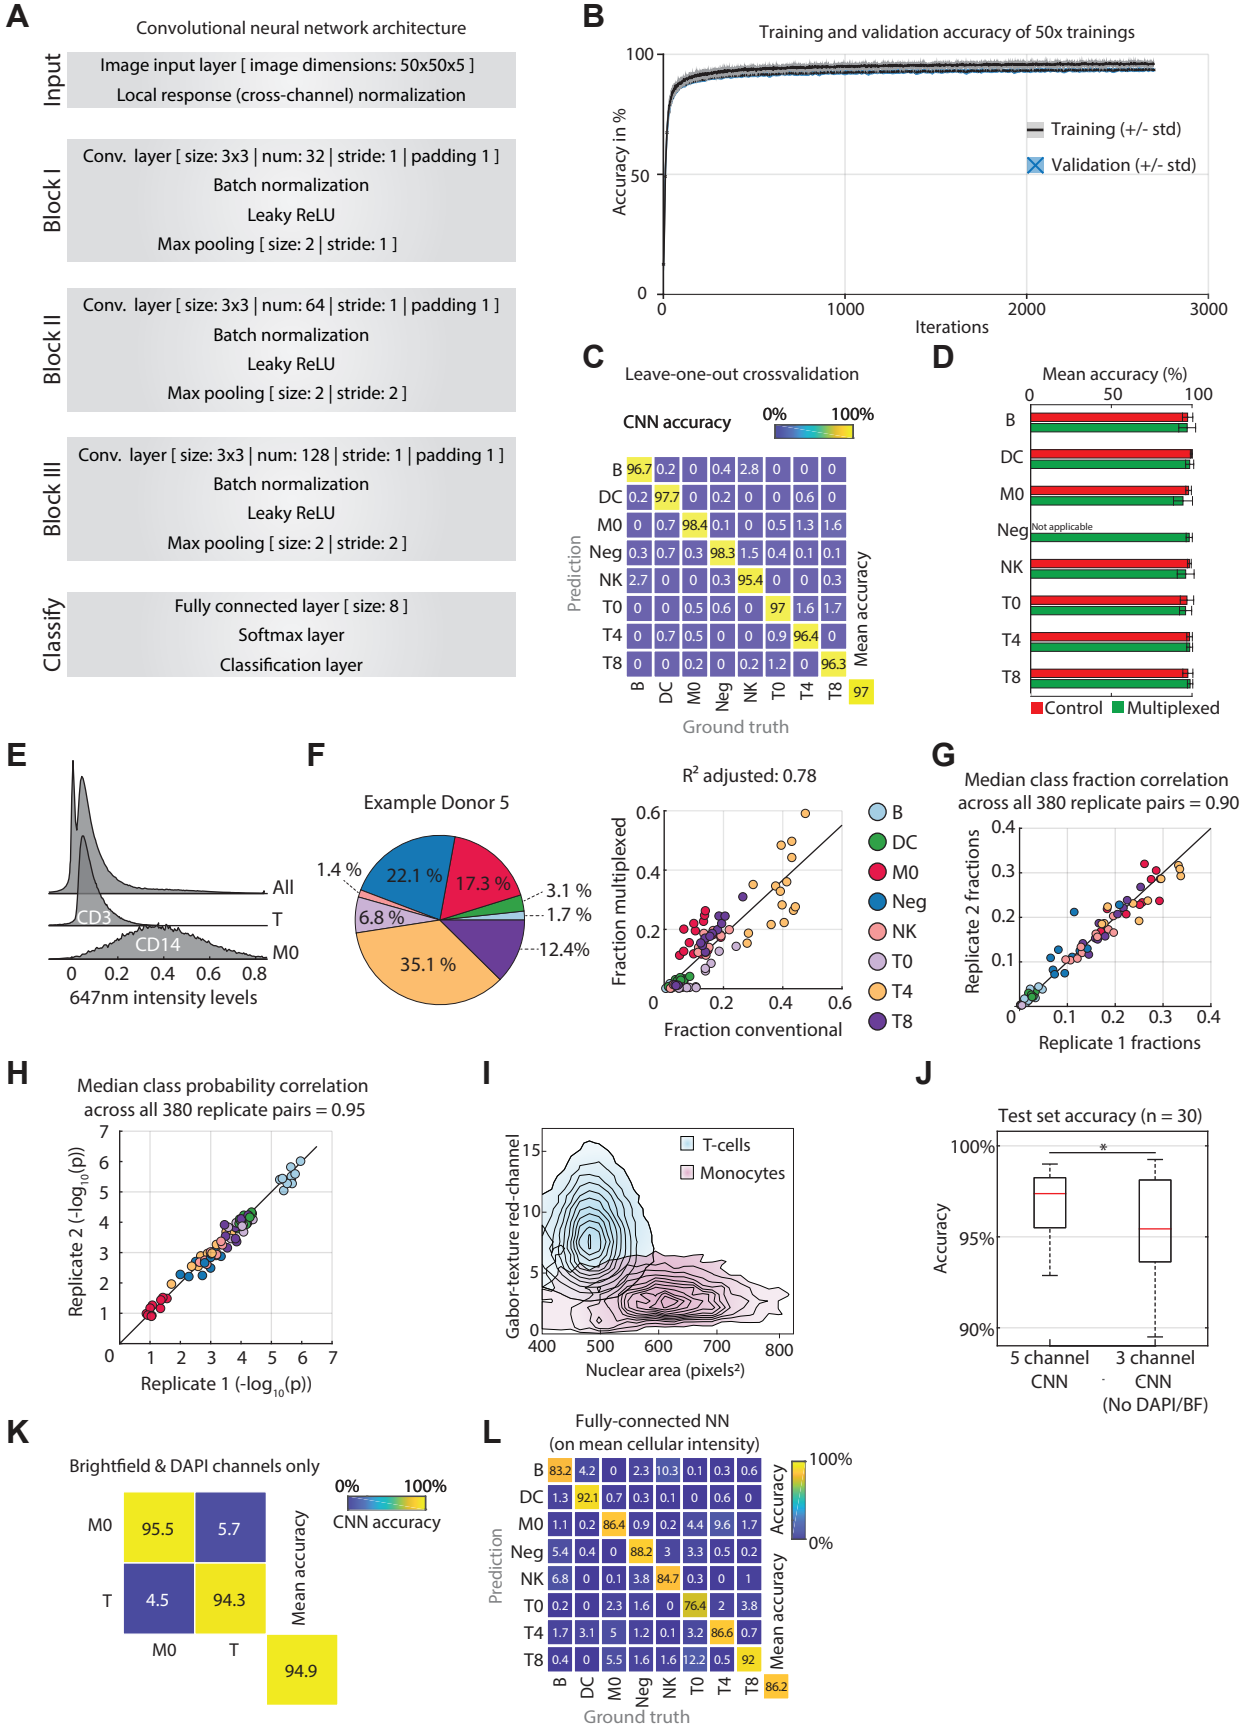

### Figure S1. Training and validation of the deep learning-enabled multiplexed PBMC imaging workflow

**(A)** Overview of the convolutional neural network architecture. **(B)** Average and standard deviation of training and validation accuracies over 20 randomly initialized CNN instances. Validation set represents 10% of the initial training set (n=8948). Network training after 20 epochs. **(C)** Confusion matrix of CNN performance on a leave-one-out cross validation per donor. The CNN was trained with 14 donors and subsequently tested on an unseen donor not included in the training dataset. The confusion matrix shows the mean accuracies after iterating across all donors. **(D)** Comparison of prediction accuracy on conventionally stained and multiplexed cells. Bar plots show the mean accuracy (in %) and the standard deviation of the CNN prediction across all donors individually per class and staining. **(E)** Distribution of 647nm intensity levels across all cells (upper), classified CD3<sup>+</sup> T-cells (middle) and classified CD14<sup>+</sup> monocytes (lowest) of Donor 1. A cell class probability threshold of 0.8 was applied. **(F)** Population percentages for Donor 5 (left) and class fraction comparison of conventionally stained and multiplexed cells across 15 healthy donors. Negative cell class is excluded due to its unavailability in conventional stainings. **(G)** Class fraction comparison of two single replicates (plate wells) across all 10 donors. Each dot corresponds to a replicate pair from a single donor. Color indicates the cell type. The median pairwise correlation across all technical replicates is indicated. **(H)** Median class probability comparison of two single replicates (plate wells) across all 15 donors. Shown statistic depicts the median class probability correlation of all pairwise replicate combinations per donor across two individual 384 well plates. **(I)** Comparison of selected morphological and staining-pattern parameters divergent between T-cells and monocytes. Conventionally stained T-cells and monocytes from Donor 1 were identified by immunofluorescence gating for CD3 and CD14, respectively. Morphological features were extracted by CellProfiler. **(J)** Test set accuracies of either a CNN trained on all 5 channels, or trained without the DAPI & BF channel. Boxplots show the accuracies of the multiplexed and control test-sets of each of the 15 donors; n=30. **(K)** Confusion matrix of CNN performance on classifying T-cells and monocytes based on brightfield and DAPI channels only. An adapted CNN architecture (2-channel input and 2 class output) was trained with 1900 2-channel images of T-cells and monocytes. Network performance was evaluated in the curated test set containing 750 cells per class. **(L)** Confusion matrix of the performance of a feedforward fully-connected neural network with a size of 10 nodes trained on mean channel intensity measurements. Mean intensity features per single-cell were measured using CellProfiler for all five channels, matching the cells used in the CNN training and test sets.

Fig. S2

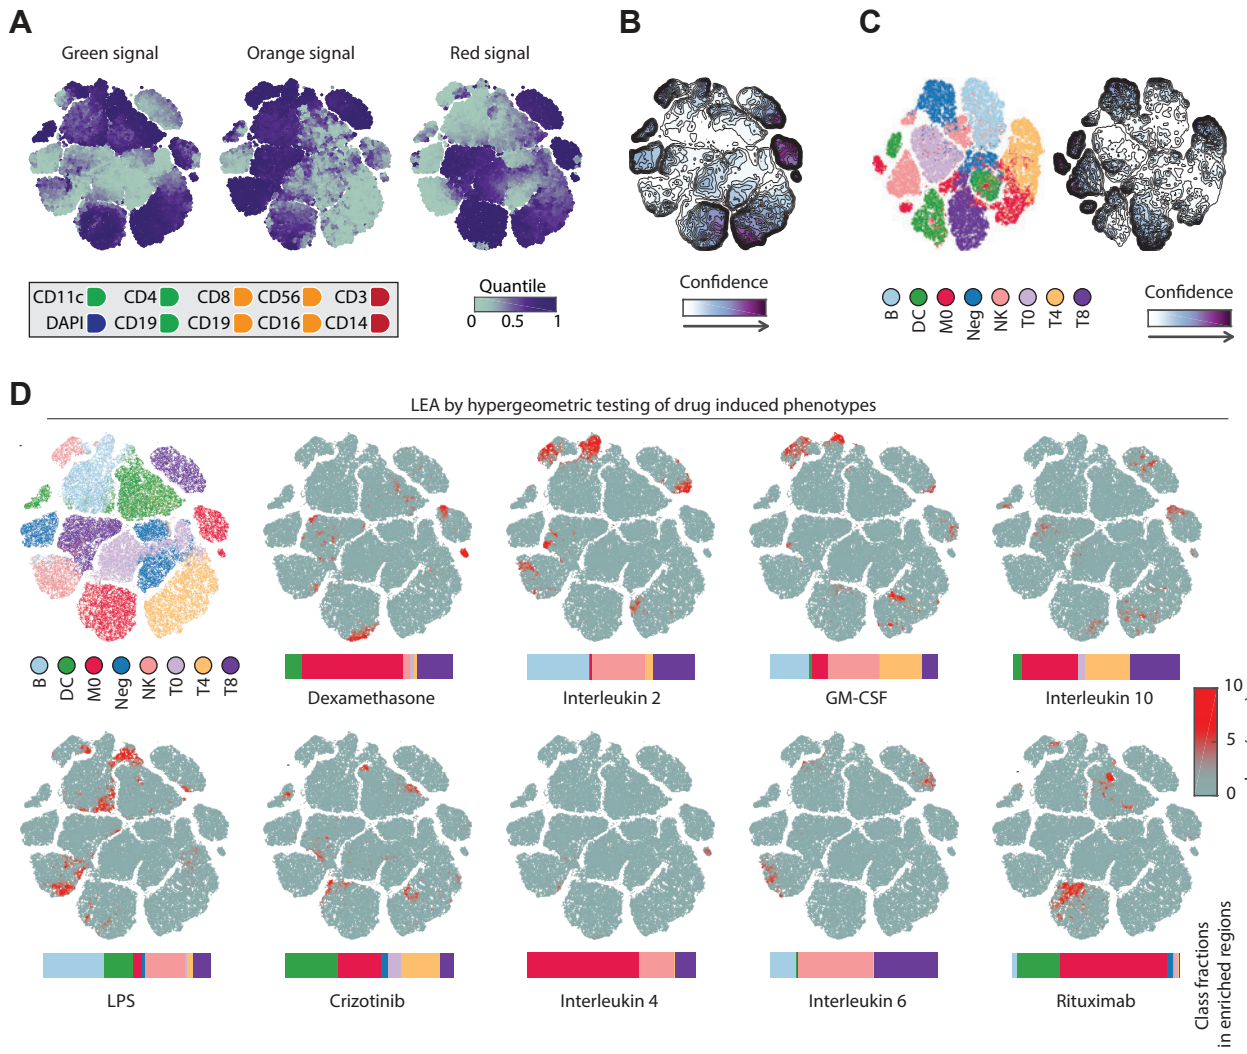



**Figure S2. Detailed view on the perturbed immune system of a single donor.**

**(A)** Selected single-cell features mapped onto the same t-SNE map as depicted in Figure 3A. Median value of overlapping data points is calculated and color is assigned accordingly. Points are plotted in order of intensity, from highest to lowest. **(B)** Associated CNN probability contour plot of the phenotypic landscape of the immune system depicted in Figure 3A. **(C)** Left: Phenotypic landscape of the immune system across ten healthy donors. t-SNE embedding of the 8-class CNN probabilities without a confidence threshold of up to 1000 randomly subsampled multiplexed cells per class and per donor. Right: Associated CNN probability contour plot of the phenotypic landscape depicted left. **(D)** LEAs visualized by t-SNE of drug induced phenotypes. Horizontal bar graphs indicate the class fractions in enriched regions (at  $p_{\text{adjust}} < 0.01$ ).

Fig. S3

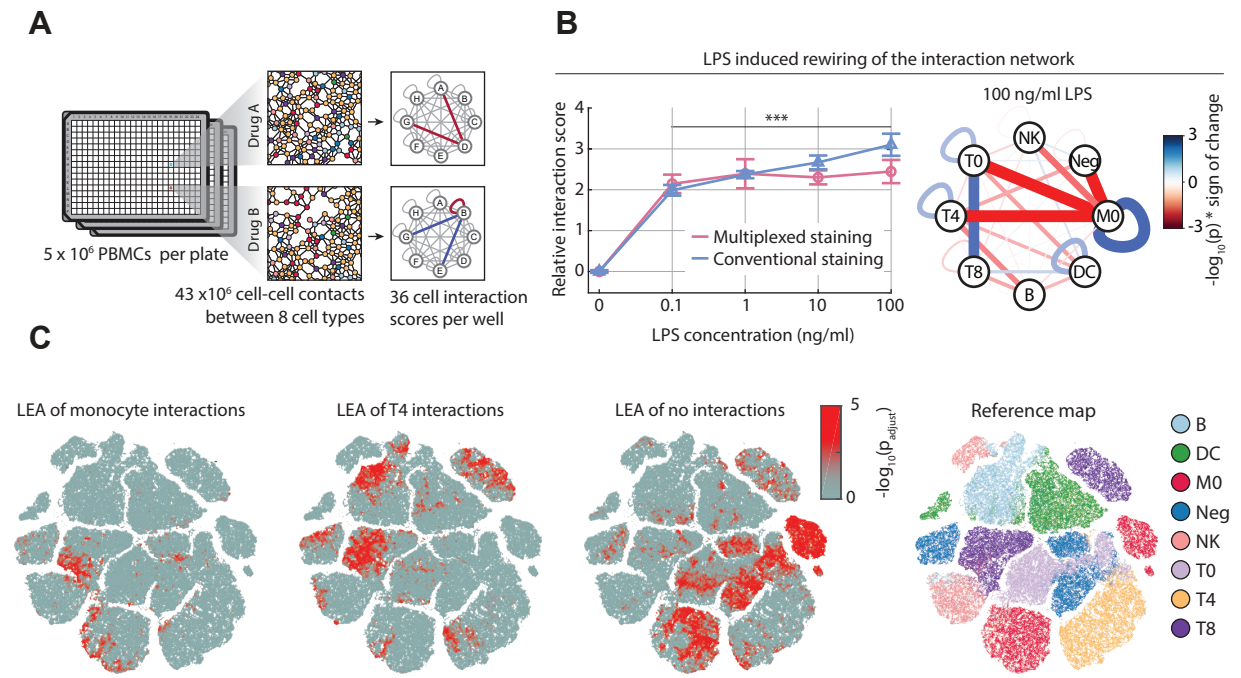

**Figure S3. Perturbation-induced rewiring of cell-cell contacts of the human immune system.**

**(A)** Overview of cell-cell contact analysis over five million PBMCs. Cell-to-cell interaction networks between eight different immune cell populations with a total of 36 cell type interactions were generated per well, and compared across conditions. **(B)** LPS-induced rewiring of the cell-to-cell interaction network. Relative monocyte-to-monocyte interaction scores of multiplexed and conventionally stained wells as a function of increasing LPS concentration (left). Mean interaction score across all replicates is calculated and normalized against control treatment. Example LPS interaction network for 100ng/ml LPS (right). Significance of interaction ( $-\log_{10}(p)$ , multiplied times the sign of the phenotype (either positive or negative interaction score)). **(C)** LEA of cells with monocytes (left), T-cells (middle) or no-nearest neighbor (right).

Fig. S4

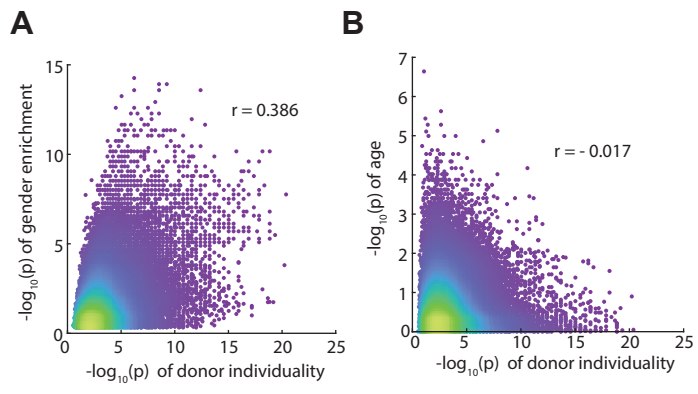

**Figure S4. Comparative analysis of LEA-based phenotype and health parameter associations**

**(A)** Comparison of donor LEA enrichments (as in Figure 4A) vs gender LEA enrichments (as in Figure 4B) per single cell.  $r$  values represent Pearson correlations. **(B)** Comparison of donor LEA enrichments vs age LEA enrichments per single cell (as in Figure 4D).  $R$  values represent Pearson correlations.

Fig. S5

**A**

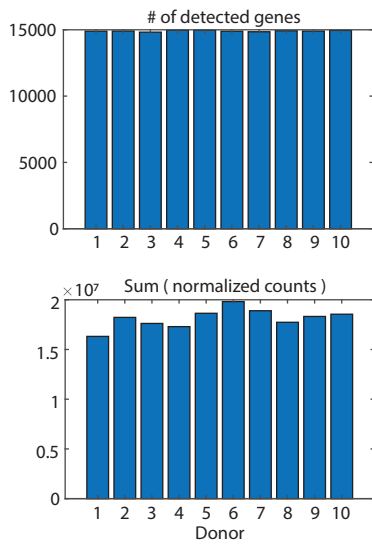

**B**

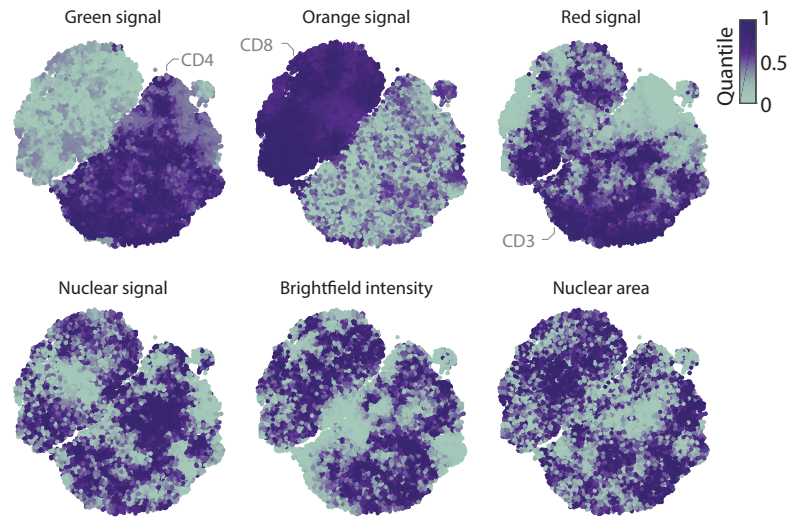

**C**

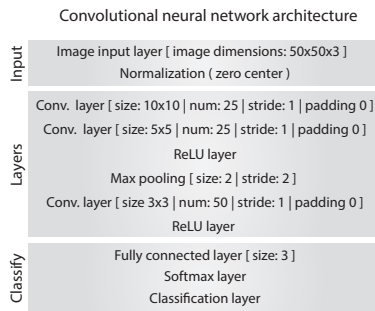

**D**

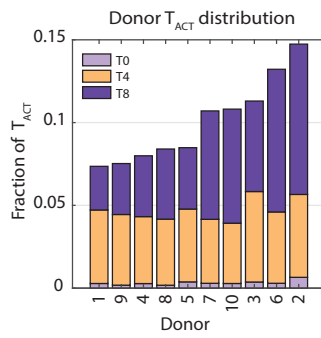

**E**

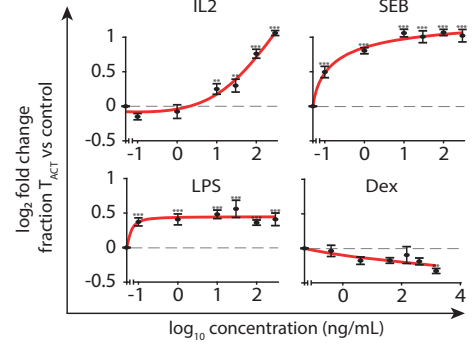

**F**

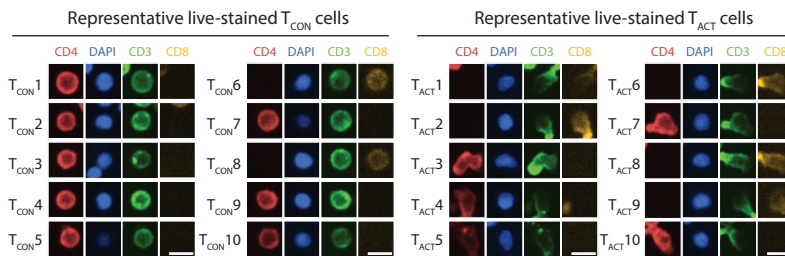

**Figure S5. T-cell transcriptomics, phenotyping, and validation of an activated T-cell morphology.**

**(A)** Upper: Bar graphs indicate the number of detected transcripts (protein coding and long non-coding RNAs) after applying a threshold of 20 raw counts. Lower: Bar graphs indicated the sum of transcript counts after DESeq2 normalization (76). **(B)** Selected single-cell features projected onto the t-SNE depicted in Figure 5A. Median value of overlapping data points is calculated and color is assigned accordingly. Points are plotted in ascending order with the lowest intensity on top. **(C)** Overview of the label-free T-cell activation ( $T_{ACT}$ ) convolutional neural network architecture. **(D)** Fraction of  $T_{ACT}$  cells per class and per donor. Stacked bar plots show the mean fraction of all T-cells per donor classified as  $T_{ACT}$ , within their respective T-cell subclass (T0, T4 or T8) in control (DMSO) conditions. **(E)** Induction and suppression of the  $T_{ACT}$  cell phenotype by immunomodulatory agents. Plotted are the log<sub>2</sub> fold changes of the mean fraction of T-cells classified as  $T_{ACT}$  across all wells of each drug condition compared to control treatments. Cells were incubated with immunomodulatory agents at 0.1, 1, 10, 30, 100 and 300 ng/ml. Error bars show the standard error of the mean across wells for each drug condition. A custom Hill function (adjusted to different minima and maxima) was used to fit the data (red line). **(E)** Representative live-stained  $T_{ACT}$  and  $T_{CON}$  cell morphologies. Crop-size is 15 x 15  $\mu\text{m}$ . All scale bars = 10 $\mu\text{m}$ .

Fig. S6

**A**

Influence of donor age on T-cell phenotypes in relation to molecular pathways

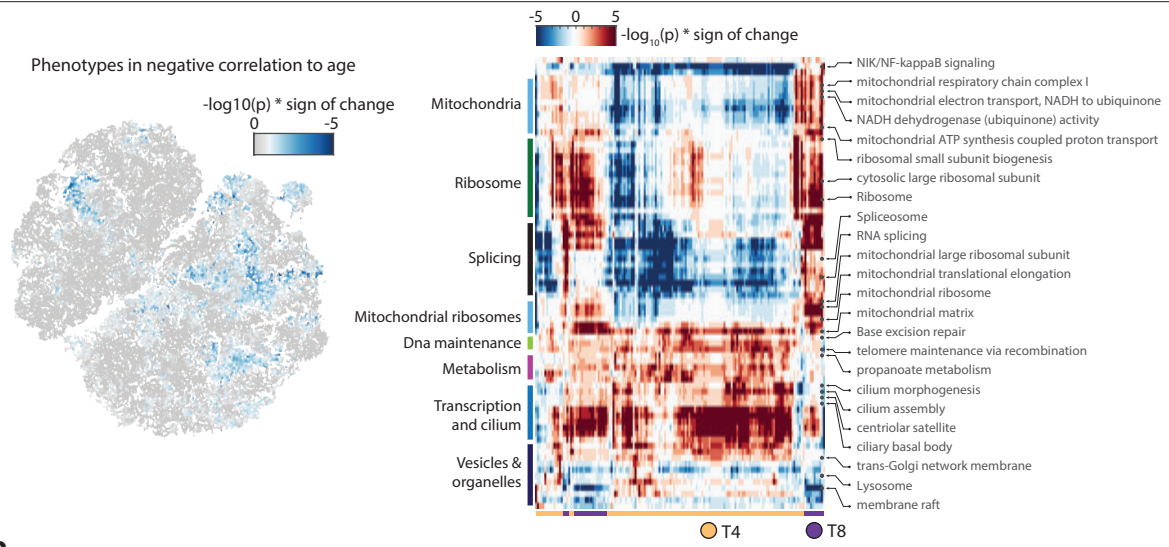

**B**

CNN-architecture and classification accuracy of the validation cohort

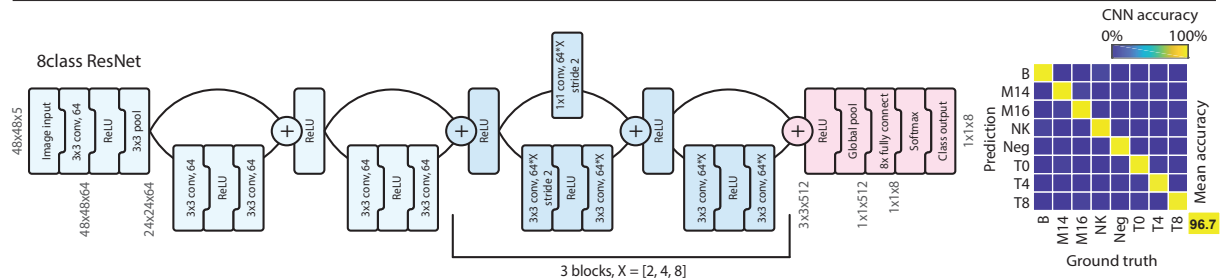



**Figure S6. Influence of donor age on T-cell phenotypes in relation to molecular pathways.**

**(A)** Left: negative LEA associations with donor age projected onto the t-SNE (colored by  $-\log_{10}(p)$ ). Right: Heatmap overview of all significantly enriched pathways in positive age-associated T-cells ( $-\log_{10}(p) < 5$ ). Rows are annotations, columns are significantly age-associated cells. **(B)** Left: Schematic of the 8-class ResNet architecture used for the 15 donor validation cohort. Right: Confusion matrix of the CNN. CNN was tested on 1000 cells per class that the CNN did not see before.

**Supplementary Data File 1. Example LEA implementation.**

This zip file contains an example MATLAB implementation of a LEA analysis. The data file contains the LEA code, an example script with implementation, and the data corresponding to Figure 3 and S2, including all relevant and required annotations. The code has been tested on MATLAB version R2020b.

Supplementary Table 1

| Epitope                 | Vendour                  | Fluorophore     | Clone   | Host  | Staining Control | Used in multiplexed | Lot     |
|-------------------------|--------------------------|-----------------|---------|-------|------------------|---------------------|---------|
| CD3                     | BioLegend                | Alexa Fluor 647 | UCHT1   | Mouse | 1                | yes                 | B246715 |
| CD4                     | BioLegend                | FITC            | SK3     | Mouse | 1                | yes                 | B244280 |
| CD8                     | BioLegend                | Alexa Fluor 594 | RPA-T8  | Mouse | 1                | yes                 | B200099 |
| CD19                    | BioLegend                | FITC            | SJ25C1  | Mouse | 3                | yes                 | B239447 |
| CD19                    | BioLegend                | PE              | SJ25C1  | Mouse | 3                | yes                 | B237928 |
| CD56                    | Beckman Coulter          | PE              | N901    | Mouse | 2                | yes                 | 52      |
| CD16                    | BioLegend                | PE              | 3G8     | Mouse | 2                | yes                 | B238510 |
| CD14                    | BioLegend                | Alexa Fluor 647 | HCD14   | Mouse | 2&3              | yes                 | B260484 |
| CD11c                   | BioLegend                | Alexa Fluor 488 | 3.9     | Mouse | 2&3              | yes                 | B209841 |
| CD3                     | BioLegend                | Alexa Fluor 488 | UCHT1   | Mouse | /                | no                  | B278994 |
| CD4                     | Biologend                | Alexa Fluor 647 | SK3     | Mouse | /                | no                  | B293054 |
| CD8                     | Biologend                | Alexa Fluor 594 | RPA-T8  | Mouse | /                | no                  | B200099 |
| pNFkB p65 (Ser529)      | eBioscience              | PE              | B33B4WP | Mouse | /                | no                  | 4303324 |
| pERK1/2 (Thr202 Tyr204) | Thermo Fisher Scientific | PE              | MILAN8R | Mouse | /                | no                  | 4337535 |

**Supplementary Table 1. Staining panel details.**

Supplementary Table 2

| Compound name                            | Vendour           | Assay conc. | Carrier solution and control |
|------------------------------------------|-------------------|-------------|------------------------------|
| Crizotinib                               | Sigma-Aldrich     | 10uM        | 1% DMSO                      |
|                                          |                   | 1uM         | 0.1% DMSO                    |
|                                          |                   | 0.1uM       | 0.01% DMSO                   |
|                                          |                   | 0.01uM      | 0.001% DMSO                  |
| Dexamethasone                            | Sigma-Aldrich     | 400ng/ml    | 1% DMSO                      |
|                                          |                   | 40ng/ml     | 0.1% DMSO                    |
|                                          |                   | 4ng/ml      | 0.01% DMSO                   |
|                                          |                   | 0.4ng/ml    | 0.001% DMSO                  |
| Lipopolysaccharide from Escherichia coli | Sigma-Aldrich     | 100ng/ml    | PBS                          |
|                                          |                   | 10ng/ml     | PBS                          |
|                                          |                   | 1ng/ml      | PBS                          |
|                                          |                   | 0.1ng/ml    | PBS                          |
| Rituximab                                | Absolute antibody | 1ug/ml      | PBS                          |
|                                          |                   | 0.5ug/ml    | PBS                          |
|                                          |                   | 0.1ug/ml    | PBS                          |
|                                          |                   | 0.05ug/ml   | PBS                          |
| Recombinant Human IL-2                   | PeproTech         | 100ng/ml    | 0.001% (w/v) BSA in PBS      |
|                                          |                   | 10ng/ml     | 0.0001% (w/v) BSA in PBS     |
|                                          |                   | 1ng/ml      | 0.00001% (w/v) BSA in PBS    |
|                                          |                   | 0.1ng/ml    | 0.000001% (w/v) BSA in PBS   |
| Recombinant Human IL-4                   | PeproTech         | 100ng/ml    | 0.001% (w/v) BSA in PBS      |
|                                          |                   | 10ng/ml     | 0.0001% (w/v) BSA in PBS     |
|                                          |                   | 1ng/ml      | 0.00001% (w/v) BSA in PBS    |
|                                          |                   | 0.1ng/ml    | 0.000001% (w/v) BSA in PBS   |
| Recombinant Human IL-6                   | PeproTech         | 100ng/ml    | 0.001% (w/v) BSA in PBS      |
|                                          |                   | 10ng/ml     | 0.0001% (w/v) BSA in PBS     |
|                                          |                   | 1ng/ml      | 0.00001% (w/v) BSA in PBS    |
|                                          |                   | 0.1ng/ml    | 0.000001% (w/v) BSA in PBS   |
| Recombinant Human IL-10                  | PeproTech         | 100ng/ml    | 0.001% (w/v) BSA in PBS      |
|                                          |                   | 10ng/ml     | 0.0001% (w/v) BSA in PBS     |
|                                          |                   | 1ng/ml      | 0.00001% (w/v) BSA in PBS    |
|                                          |                   | 0.1ng/ml    | 0.000001% (w/v) BSA in PBS   |
| Recombinant Human G-MCSF                 | PeproTech         | 100ng/ml    | 0.001% (w/v) BSA in PBS      |
|                                          |                   | 10ng/ml     | 0.0001% (w/v) BSA in PBS     |
|                                          |                   | 1ng/ml      | 0.00001% (w/v) BSA in PBS    |
|                                          |                   | 0.1ng/ml    | 0.000001% (w/v) BSA in PBS   |

**Supplementary Table 2. Immunomodulatory perturbations.**

Supplementary Table 3

**Discovery cohort (Figure 1, Figure 2, Figure 4, Figure 5 A-G, Figure 6 A-B)**

| Whole Blood Donor | Year of birth | Blood type | weight in kg | Height in cm | Gender | Blood pressure | Hb level |
|-------------------|---------------|------------|--------------|--------------|--------|----------------|----------|
| 1                 | 1999          | A+         | 68           | 174          | m      | 128/70         | 156      |
| 2                 | 1987          | A+         | 66           | 170          | m      | 173/99         | 147      |
| 3                 | 1990          | A+         | 50           | 163          | f      | 114/80         | 148      |
| 4                 | 2000          | A+         | 63           | 168          | f      | 122/74         | 133      |
| 5                 | 1968          | O-         | 58           | 165          | f      | 158/90         | 151      |
| 6                 | 1974          | B+         | 95           | 176          | m      | 156/98         | 177      |
| 7                 | 1950          | O+         | 72           | 175          | f      | 126/78         | 130      |
| 8                 | 1967          | A+         | 95           | 178          | m      | 146/86         | 161      |
| 9                 | 1967          | O+         | 80           | 180          | m      | 160/106        | 167      |
| 10                | 1965          | A+         | 80           | 180          | m      | 130/82         | 167      |

**Immuno-modulatory screen (Figure 3)**

| Buffy coat donor | Year of birth | Blood type | weight in kg | Height in cm | Gender | Blood pressure | Hb level |
|------------------|---------------|------------|--------------|--------------|--------|----------------|----------|
| 1                | 1968          | AB+        | 73           | 180          | m      | 146/92         | 153      |

**Validation cohort (Figure 5H, Figure 6C)**

| Buffy coat Donor | Year of birth | Blood type | weight in kg | Height in cm | Gender | Blood pressure | Hb level |
|------------------|---------------|------------|--------------|--------------|--------|----------------|----------|
| 1                | 1994          | B+         | 65           | 183          | m      | 135/77         | 152      |
| 2                | 1970          | B+         | 69           | 177          | f      | 148/92         | 147      |
| 3                | 1996          | B+         | 75           | 192          | m      | 138/91         | 157      |
| 4                | 1994          | B+         | 85           | 180          | m      | 124/74         | 159      |
| 5                | 1953          | B-         | 65           | 178          | m      | 142/95         | 168      |
| 6                | 1971          | AB-        | 65           | 171          | f      | 114/72         | 141      |
| 7                | 1991          | B+         | 67           | 180          | f      | 135/94         | 145      |
| 8                | 1963          | B+         | 65           | 157          | f      | 146/99         | 157      |
| 9                | 1963          | B+         | \            | \            | m      | 170/90         | 169      |
| 10               | 1953          | O-         | 76           | 158          | f      | 142/100        | 149      |
| 11               | 1999          | AB+        | 61           | 169          | f      | 131/74         | 136      |
| 12               | 1960          | B+         | 90           | 182          | m      | 155/98         | 151      |
| 13               | 1999          | B+         | 66           | 173          | m      | 171/103        | 157      |
| 14               | 1967          | B+         | 80           | 182          | m      | 162/102        | 174      |
| 15               | 1989          | AB-        | 72           | 178          | f      | 108/63         | 138      |

**Supplementary Table 3. Overview of the human healthy donor cohorts.**
